# Supplementary material for: Whole grain germinated brown rice intake modulates the gut microbiota and alleviates hypertriglyceridemia and hypercholesterolemia in high fat diet-fed mice
Source: Royal Society of Chemistry journal article supplement (doi:10.1039/d3fo03288d), 2023-11-14

## Supplementary tables

**Table 1 Comparison of the nutritional ingredient of germinated brown rice and refined rice**

| Nutrients                         | Refined rice             | Germinated brown rice    |
|-----------------------------------|--------------------------|--------------------------|
| Protein (g/100 g)                 | 6.80 ± 0.05 <sup>a</sup> | 7.30 ± 0.29 <sup>a</sup> |
| Fat (g/100 g)                     | 1.30 ± 0.03 <sup>b</sup> | 2.90 ± 0.14 <sup>a</sup> |
| Carbohydrate (g/100 g)            | 78.0 ± 1.18 <sup>a</sup> | 76.2 ± 1.59 <sup>a</sup> |
| Dietary fiber (g/100 g)           | 0.74 ± 0.35 <sup>b</sup> | 2.80 ± 0.56 <sup>a</sup> |
| Insoluble dietary fiber (g/100 g) | 0.63 ± 0.21 <sup>b</sup> | 2.21 ± 0.17 <sup>a</sup> |
| Soluble dietary fiber (g/100 g)   | 0.11 ± 0.08 <sup>b</sup> | 0.59 ± 0.06 <sup>a</sup> |
| VB <sub>1</sub> (mg/100 g)        | 0.12 ± 0.02 <sup>b</sup> | 0.30 ± 0.09 <sup>a</sup> |
| VE (mg/100 g)                     | 0.40 ± 0.06 <sup>b</sup> | 1.70 ± 0.06 <sup>a</sup> |
| γ-aminobutyric acid (mg/100 g)    | 1.50 ± 0.11 <sup>b</sup> | 16.5 ± 0.61 <sup>a</sup> |
| Inositol hexaphosphate (mg/100 g) | 0.03 ± 0.02 <sup>b</sup> | 0.11 ± 0.04 <sup>a</sup> |
| Mg (mg/100 g)                     | 33.0 ± 0.98 <sup>b</sup> | 74.0 ± 1.35 <sup>a</sup> |
| Fe (mg/100 g)                     | 0.50 ± 0.23 <sup>b</sup> | 1.10 ± 0.08 <sup>a</sup> |
| Ca (mg/100 g)                     | 6.00 ± 0.28 <sup>a</sup> | 8.10 ± 0.24 <sup>a</sup> |

The results are presented as mean ± standard deviation (n=3), and the values in each line with different letters are significantly different ( $p < 0.05$ ).

**Table 2 Composition of experimental diets**

| Ingredient (%)           | Experimental group <sup>a</sup> |       |      |       |         |       |
|--------------------------|---------------------------------|-------|------|-------|---------|-------|
|                          | Con                             |       | HFD  |       | HFD+GBR |       |
| Soybean meal             | 18.0                            |       | 18.0 |       | 18.0    |       |
| Fish meal                | 10.0                            |       | 10.0 |       | 10.0    |       |
| Soybean oil              | 3.0                             |       | 3.0  |       | 3.0     |       |
| Wheat bran               | 5.0                             |       | 3.0  |       | 3.0     |       |
| Maltodextrin             | 2.0                             |       | 2.0  |       | 2.0     |       |
| Alfalfa Powder           | 2.0                             |       | 2.0  |       | 2.0     |       |
| Beer yeast powder        | 1.0                             |       | 1.0  |       | 1.0     |       |
| Minerals, vitamins, etc  | 1.0                             |       | 1.0  |       | 1.0     |       |
| Wheat                    | 10.0                            |       | -    |       | -       |       |
| Corn                     | 2.0                             |       | -    |       | -       |       |
| Lard oil                 | -                               |       | 10   |       | 10      |       |
| Yolk powder              | -                               |       | 5    |       | 5       |       |
| Whole milk powder        | -                               |       | 4    |       | 4       |       |
| Cholesterol              | -                               |       | 1    |       | 1       |       |
| Sodium cholate           | -                               |       | 0.2  |       | 0.2     |       |
| Refined rice             | 40                              |       | 40   |       | -       |       |
| Germinated brown rice    | -                               |       | -    |       | 40      |       |
|                          | gm%                             | kcal% | gm%  | kcal% | gm%     | kcal% |
| Protein                  | 20                              | 17.9  | 20.5 | 15.7  | 20.5    | 15.7  |
| Carbohydrate             | 69                              | 61.9  | 53.5 | 41.1  | 53.5    | 41.1  |
| Fat                      | 10                              | 20.2  | 25   | 43.2  | 25      | 43.2  |
| Total calories (kcal/gm) | 4.46                            |       | 5.21 |       | 5.21    |       |

<sup>a</sup>The Con group: a normal chow diet based on 40.0 % (w/w) refined rice; the HFD group: a high-fat diet based on 40.0% (w/w) refined rice; the HFD+GBR group: a high-fat diet based on 40.0% (w/w) germinated brown rice.

**Table 3 List of PCR primer sequences for RT-qPCR**

| Gene name          | Forward primer (5' to 3')            | Reverse primer (5' to 3')         |
|--------------------|--------------------------------------|-----------------------------------|
| <i>β-actin</i>     | ATC ATG TTT GAG ACC TTC AAC ACC      | AGA GCA ACA TAG CAC AGC TTC TCT T |
| <i>Pcsk9</i>       | CAT TGT GGT GCT GAT GGA GGA GAC      | CCA ACA GGT CAC TGC TCA TCT TCA C |
| <i>Hmgcr</i>       | TTG GTC CTT GTT CAC GCT CAT AGT C    | TCA CTT GCT CAA TGT CCA TGC TGA T |
| <i>Srebp-2</i>     | AGC GGT GGA GTC CTT GGT GAA          | CGG AAC TGC TGG AGA ATG GTG AG    |
| <i>Apob</i>        | ATC AAG GCT GGT GTA AGA CTG GAA<br>T | TGA CTC GTG GAA GAA GTT GGT GTT   |
| <i>Abca1</i>       | AGT CCT ATG TGT CCT CTA CCA ACC T    | ACT GCC ATT GAT GCC GAT GAA GA    |
| <i>Ldlr</i>        | GTC TGT CAC CTG TCA GTC CAA TCA A    | CCA TCC TGG CAT CGG AAG TCA TC    |
| <i>Cyp7a1</i>      | GCT GTG GTA GTG AGC TGT TG           | GTT GTC CAA AGG AGG TTC ACC       |
| <i>Lxra</i>        | TCT TCC GCC GCA GTG TCA TCA          | GTT CCT CTT CTT GCC GCT TCA GTT   |
| <i>Zo-1</i>        | GCC GCT AAG AGC ACA GCA A            | TCC CCA CTC TGA AAA TGA GGA       |
| <i>Claudin-1</i>   | GGG GAC AAC ATC GTG ACC G            | AGG AGT CGA AGA CTT TGC ACT       |
| <i>Il-6</i>        | GAG CCC ACC AAG AAC GAT A            | TTG TCA CCA GCA TCA GTC C         |
| <i>Il-1β</i>       | CCT TCC AGG ATG AGG ACA TGA          | TGA GTC ACA GAG GAT GGG CTC       |
| <i>Leptin</i>      | ATG TTC AAG CAG TGC CTA TCC AGA A    | CAG GAA TGA AGT CCA AGC CAG TGA   |
| <i>Adiponectin</i> | CGG CAG CAC TGG CAA GTT CTA          | TCC TGA TAC TGG TCG TAG GTG AAG A |
| <i>Resistin</i>    | ACT TCA ACT CCC TGT TTC CAA ATG C    | GCT CAA GAC TGC TGT GCC TTC T     |
| <i>Tnfa</i>        | CGGTGCCTATGTCTCAGCCTCTTCT            | TGGTGGTTTGTGAGTGTGAGGGTCT         |
| <i>Inos</i>        | GACGAGACGGATAGGCAGAGATTG             | GAACTCTTCAAGCACCTCCAGGAA          |

---

|                |                                  |                                      |
|----------------|----------------------------------|--------------------------------------|
| <i>Cox2</i>    | <i>CAATGGGCTGGAAGACATATCA</i>    | <i>GCCAGGGCTGAACTTCGAA</i>           |
| <i>Cat</i>     | <i>AGGTGTTGAACGAGGAGGAGAGG</i>   | <i>TCAGCGTTGTACTIONTGTCCAGAAGAG</i>  |
| <i>Sod1</i>    | <i>AGCGGTGAACCAGTTGTGTTGTC</i>   | <i>AGTCACATTGCCAGGTCTCCAA</i>        |
| <i>Ucp2</i>    | <i>CGAAGCCTACAAGACCAT</i>        | <i>CTCAGCACAGTTGACAATG</i>           |
| <i>Acc1</i>    | <i>AATGTGGTTGTTCTGAATGGCTGTG</i> | <i>TGCTGAGTGATGGCTCCGTAGT</i>        |
| <i>Fasn</i>    | <i>CCGTGTGACCGCCATCTATATCG</i>   | <i>CGTGAGGTTGCTGTCTGTCTGTAG</i>      |
| <i>Dgat1</i>   | <i>GCTATCCAGACAACCTGACCTACC</i>  | <i>AAGAGCATCTCAAGAACTCGTCGTA</i>     |
| <i>Srebplc</i> | <i>GCCATCGACTACATCCGCTTCTT</i>   | <i>TGCCTCCTCCACTGCCACAA</i>          |
| <i>Cd36</i>    | <i>TTGCGACATGATTAATGGCACAGAC</i> | <i>TCCGAACACAGCGTAGATAGACCT</i>      |
| <i>Ppara</i>   | <i>AGAATCCACGAAGCCTACCTGAAGA</i> | <i>GGAAGAATCGGACCTCTGCCTCT</i>       |
| <i>Pparγ</i>   | <i>CTGTTCCCAAGGTGCTCCA</i>       | <i>GGCTCATGTCTGTCTCTGTCTTCTT</i>     |
| <i>Atgl</i>    | <i>CCTTCGCAATCTCTACCGCCTCT</i>   | <i>CTCCACCACAGCAGCTTCCTCT</i>        |
| <i>Hsl</i>     | <i>CACGGCGGCTGTCTAATGTCTT</i>    | <i>TGGTGTCTCTGTGTCCAGGTCAA</i>       |
| <i>Cpt1</i>    | <i>CACAACAACGGCAGAGCAGAG</i>     | <i>GGACACCACATAGAGGCAGAAGA</i>       |
| <i>Acox1</i>   | <i>CCACCGCCTATGCCTTCCACTT</i>    | <i>CACCGCAAGCCATCCGACATTC</i>        |
| <i>Pdk4</i>    | <i>CCTGCCTGACCGCTTAGTGAAC</i>    | <i>CCAGGATGCCTTGAGCCATTGTAG</i>      |
| <i>Nrf1</i>    | <i>GATGGCACCGTGTCGCTCAT</i>      | <i>ATGCTTGCGTCGTCTGGATGG</i>         |
| <i>Tfam</i>    | <i>CTTCCAGGAGGCAAAGGATGATTCG</i> | <i>ATCACTTCGTCCAACCTCAGCCATC</i>     |
| <i>Sirt1</i>   | <i>GAGACGGTATCTATGCTCGCCTTG</i>  | <i>TGACACAGAGACGGCTGGAACCT</i>       |
| <i>Pgc1α</i>   | <i>GAGTGTGCTGCTCTGGTTGGT</i>     | <i>AGGCTCATTGTTGTACTIONTGGTTGGAT</i> |

---

**Table 4 The table of the number of reads for each sample analyzed for sequencing**

| Sample\Info | Seq_num | Base_num | Mean_length | Min_length | Max_length |
|-------------|---------|----------|-------------|------------|------------|
| Con1        | 55131   | 22999277 | 417.175038  | 245        | 431        |
| Con2        | 56553   | 23943074 | 423.374074  | 252        | 510        |
| Con3        | 69226   | 28940246 | 418.054575  | 265        | 432        |
| Con4        | 51556   | 21792217 | 422.69022   | 259        | 500        |
| Con5        | 52728   | 22083119 | 418.811997  | 325        | 432        |
| Con6        | 52464   | 21956259 | 418.50143   | 259        | 489        |
| HFD1        | 48439   | 20679607 | 426.920601  | 325        | 482        |
| HFD2        | 53239   | 22484973 | 422.340258  | 315        | 505        |
| HFD3        | 42287   | 17937442 | 424.183366  | 298        | 431        |
| HFD4        | 57241   | 24053886 | 420.221275  | 283        | 498        |
| HFD5        | 40343   | 17099506 | 423.85311   | 325        | 478        |
| HFD6        | 54916   | 23232530 | 423.055758  | 280        | 467        |
| HFD+GBR1    | 49906   | 20990046 | 420.591632  | 258        | 457        |
| HFD+GBR2    | 46417   | 19360408 | 417.097357  | 216        | 432        |
| HFD+GBR3    | 50144   | 21036909 | 419.529934  | 330        | 464        |
| HFD+GBR4    | 35127   | 14927751 | 424.965155  | 311        | 431        |
| HFD+GBR5    | 46547   | 19727072 | 423.809741  | 298        | 509        |
| HFD+GBR6    | 49366   | 20756307 | 420.457542  | 282        | 499        |

### Supplementary figures

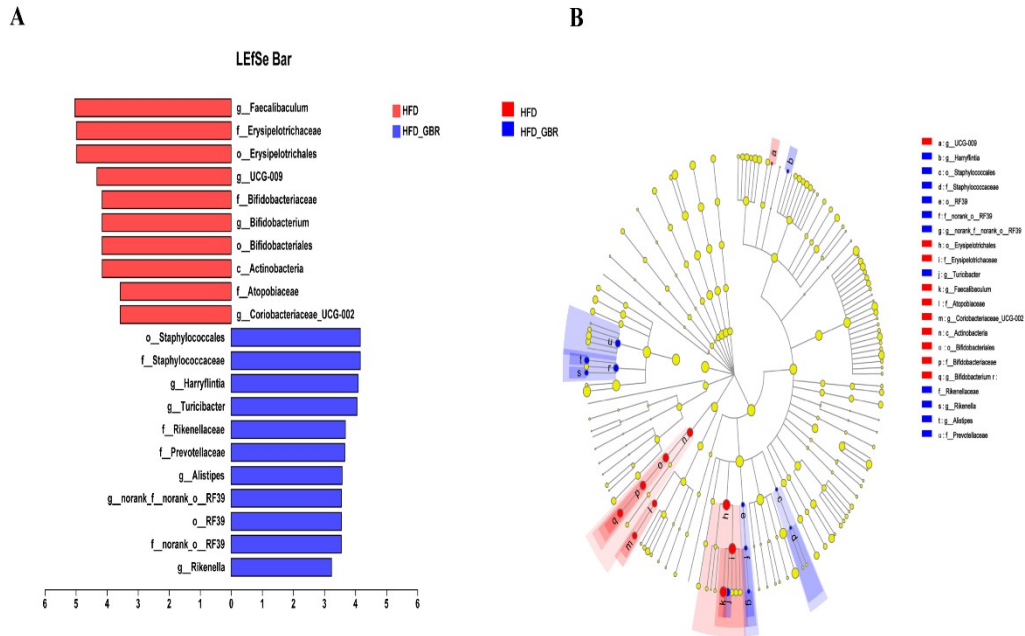

**Fig.S1 LEfSe multi-level species difference discriminant analysis was applied to discriminate the gut microbiota between the HFD group and the HFD+GBR group (Log LDA > 2.0)**

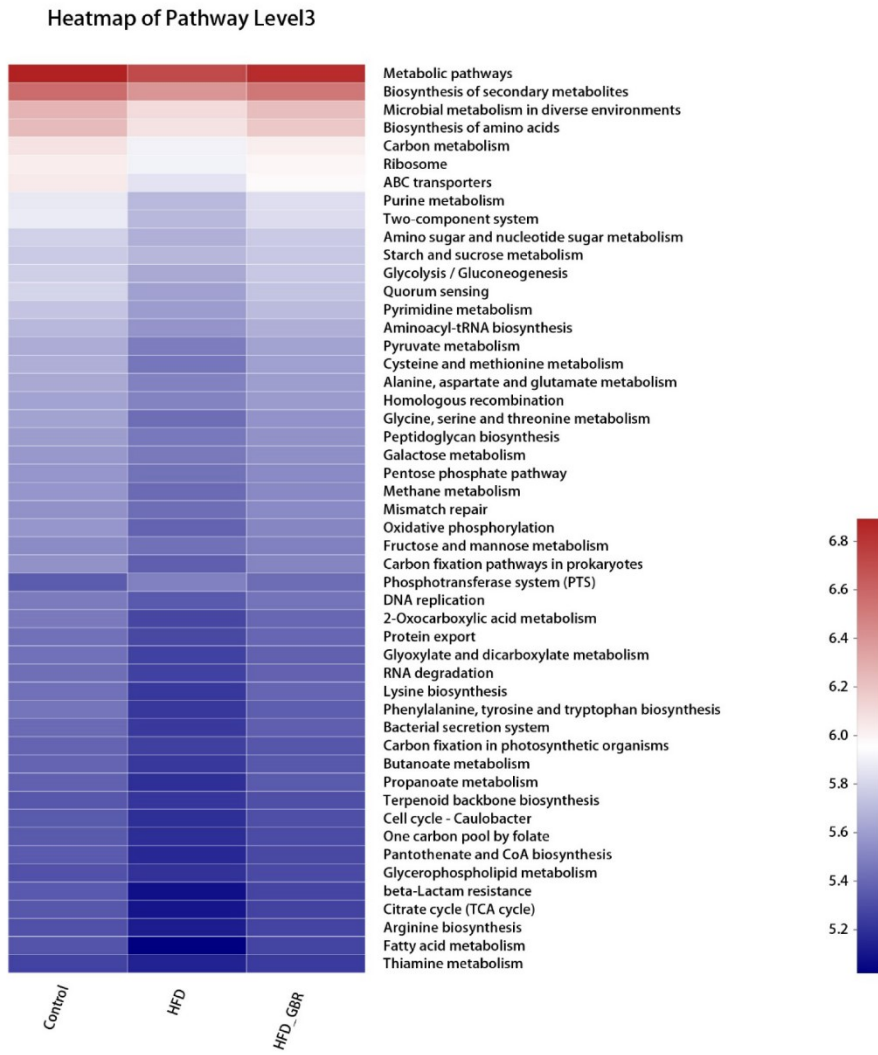

**Fig.S2 The KEGG pathway in level-3 functional prediction by PICRUSt2 (n=10)**

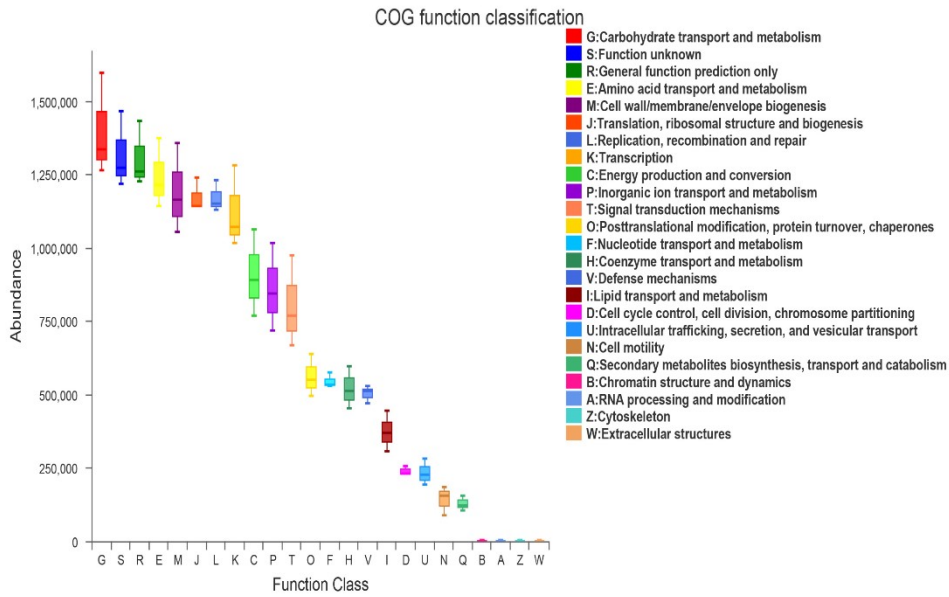

**Fig.S3 PICRUST function Prediction.** The OTU abundance table was standardized by PICRUST to remove the influence of 16S marker gene copy number in the genome of the species. Then, COG and KEGG functional annotation of OTU were performed through the corresponding greengene id of each OTU, and the annotation information of OTU at each COG and KEGG functional level and the abundance information of each function in different samples were obtained.



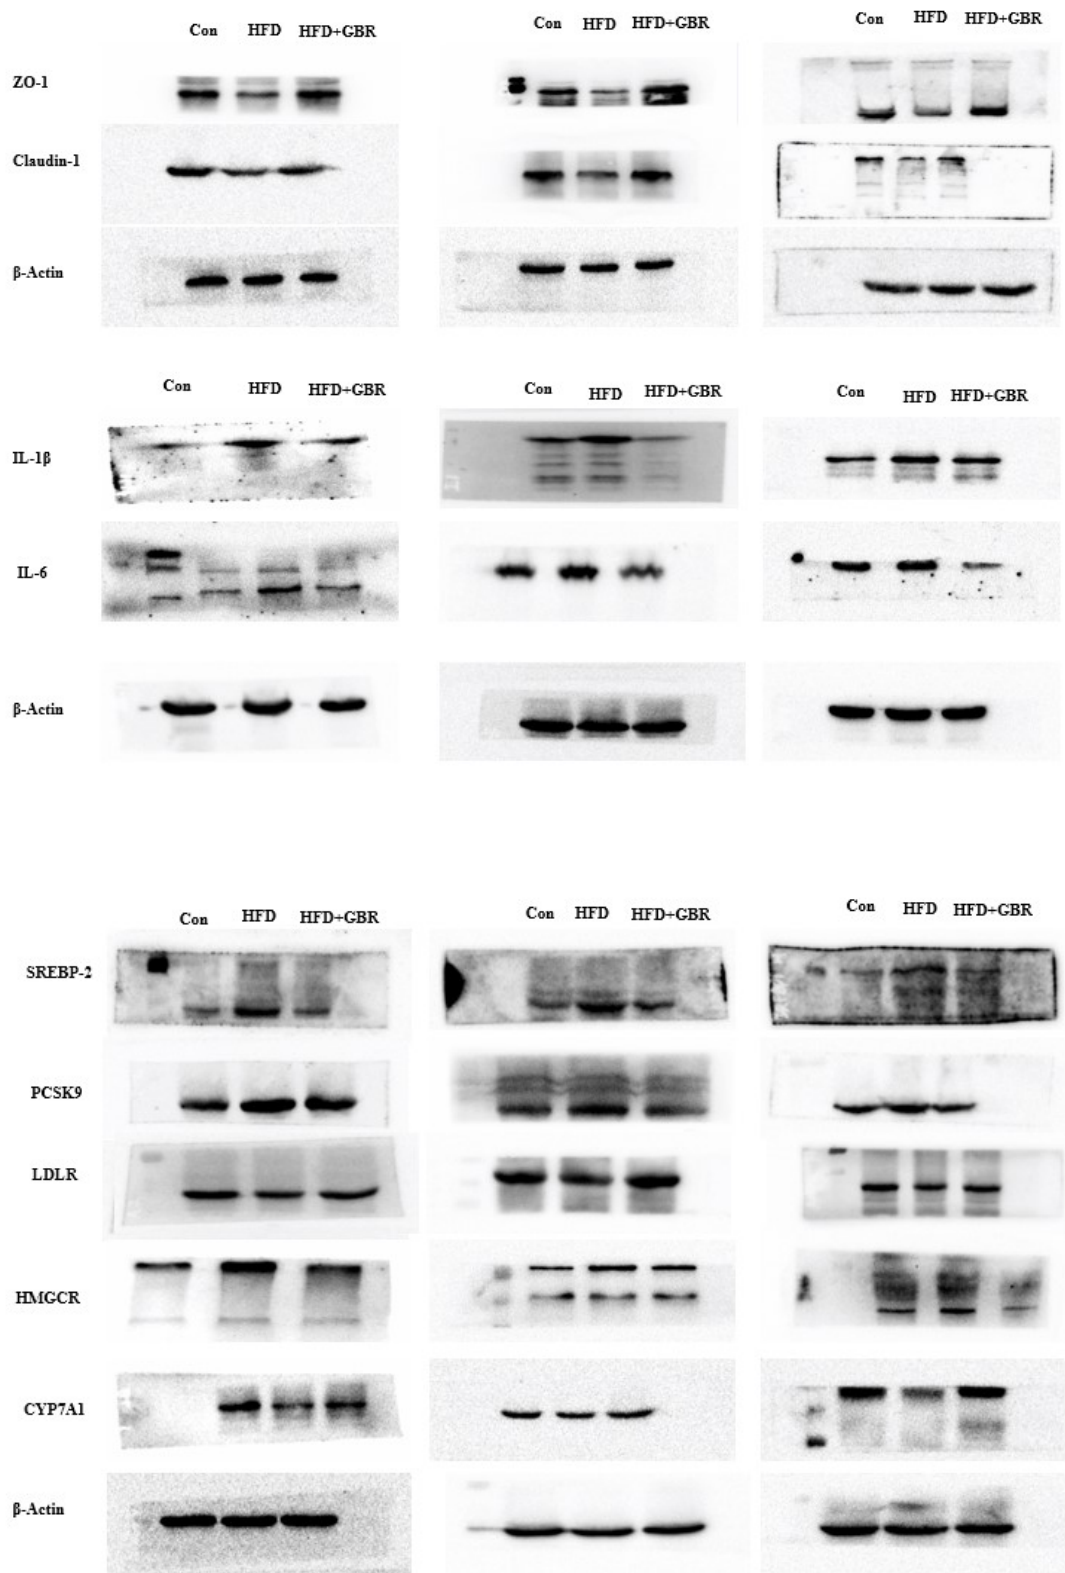

Supplement: d3fo03288d1.pdf [file d3fo03288d1.pdf]
